# Supplementary material
Source: Springer Nature journal article supplement (https://www.springermedizin.de/resource/supplementary/12943_2013_1296_MOESM6_ESM.pdf/9553206)

**A**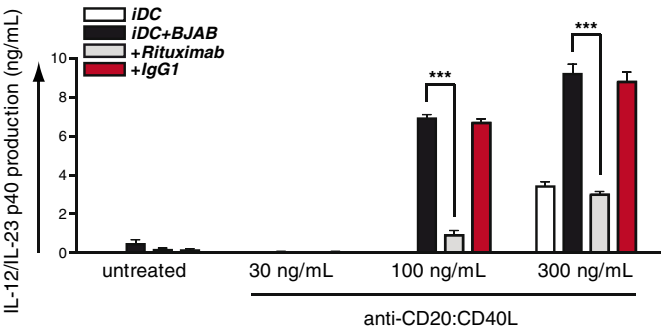**B**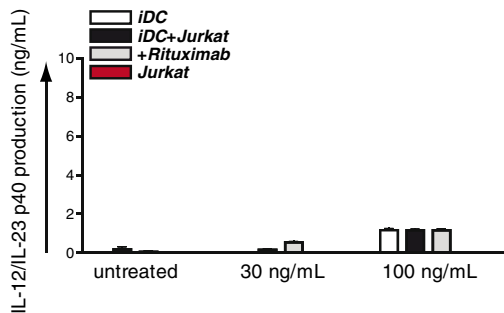**C**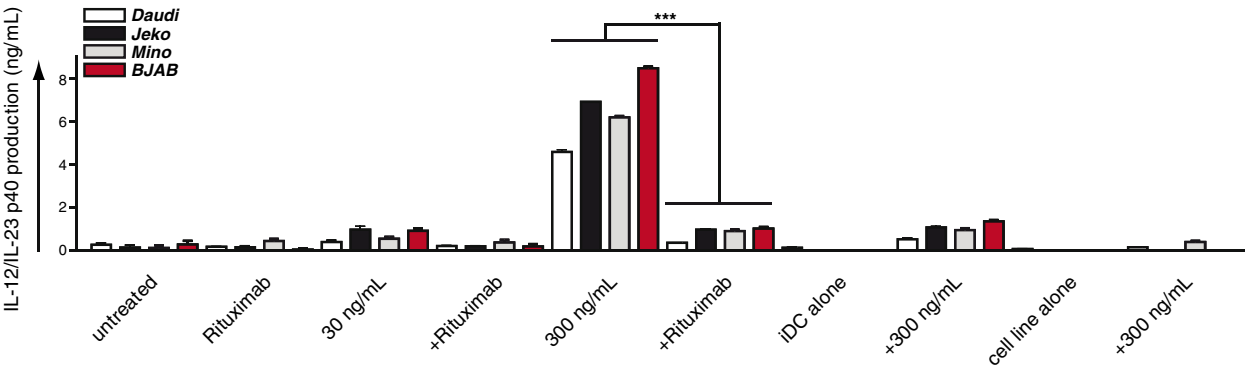

Supplement: MOESM6 [file 9553206]
